# Supplementary material for: Oncological care organisation during COVID-19 outbreak
Source: PubMed Central journal article supplement — ESMO Open. 2020 Aug 26;5(4):e000853. doi: 10.1136/esmoopen-2020-000853 (PMC7451457; doi:10.1136/esmoopen-2020-000853), 2020-08-26
Supplement: esmoopen-2020-000853supp001.pdf [file esmoopen-2020-000853supp001.pdf]

Version 1. April 10th, 2020

## Survey on oncological care organization during COVID-19 outbreak

Please answer each question.

If you don't know/don't have the info or if you are not the right person to answer, please indicate NA.

Please feel free to indicate any additional comment.

### Part 1. Protective measures before the admission to the hospital

Do you have a preselection of patients who are allowed to come to the hemato/oncological clinic/hospital before admission with the aim to have a different pathway for COVID-19-positive/suspect cases?

1. Clinical symptoms assessment by phone call:

|                                   | YES | NO | NA |
|-----------------------------------|-----|----|----|
| Before consultations              |     |    |    |
| Before day care unit              |     |    |    |
| Before overnight hospitalisations |     |    |    |

2. Clinical symptoms by an interactive online platform:

|                                   | YES | NO | NA |
|-----------------------------------|-----|----|----|
| Before consultations              |     |    |    |
| Before day care unit              |     |    |    |
| Before overnight hospitalisations |     |    |    |

3. By a naso- or oro-pharyngeal swab test:

|                                   | YES | NO | NA |
|-----------------------------------|-----|----|----|
| Before consultations              |     |    |    |
| Before day care unit              |     |    |    |
| Before overnight hospitalisations |     |    |    |

If YES, who will be tested?

- Suspicious cases  
 All cases  
 NA (see above)

If YES, how long does it take until the result is available?

.....

Version 1. April 10th, 2020

## 4. CT of chest in asymptomatic patients:

|                                   | YES | NO | NA |
|-----------------------------------|-----|----|----|
| Before consultations              |     |    |    |
| Before day care unit              |     |    |    |
| Before overnight hospitalisations |     |    |    |

if YES, for which patients?

.....

## 5. When entering the hospital, do you perform a clinical check (symptoms) before:

|                                             | YES | NO | NA |
|---------------------------------------------|-----|----|----|
| Entering the consultation room              |     |    |    |
| Entering the day care unit                  |     |    |    |
| Entering the overnight stay hospitalization |     |    |    |

## 6. Do you use other procedures?

- YES  
 NO  
 NA

If YES, please clarify:

.....

**Part 2. Patients' education**

Do you educate patients on the following topics?

## 7. To contact hemato/oncological department if they develop symptoms potentially related to COVID-19 infection

- YES  
 NO  
 NA

## 8. To avoid visits to hemato/onco logical department if they present any symptom potentially related to COVID-19 the day of consultation, day care unit visit or overnight stay

- YES  
 NO  
 NA

Version 1. April 10th, 2020

### Part 3. Permission to attend to consultations/hospitalizations for family members

9. Do you allow family members to attend:

|                               | YES | NO | NA |
|-------------------------------|-----|----|----|
| To consultations              |     |    |    |
| To day care admissions        |     |    |    |
| To overnight hospitalisations |     |    |    |

10. If YES, but only for some family members, please clarify under which circumstances and which part of the hospital:

|                                         | YES | NO | NA |
|-----------------------------------------|-----|----|----|
| If the patient is unable to enter alone |     |    |    |
| In case of a new diagnosis              |     |    |    |
| If bad news has to be announced         |     |    |    |
| For terminally ill patients             |     |    |    |

If any other condition, please clarify:

.....

### Part 4. General measures for risk reduction (in addition to social distancing and hand washing)

11. Surgical mask for patients:

- YES  
 NO  
 NA

If YES:

- For all  
 In specific situations. Please clarify: .....  
 NA

12. Surgical mask for health care providers:

- YES  
 NO  
 NA

Version 1. April 10th, 2020

If YES:

- For all
- For some healthcare providers . Please clarify: .....
- NA

13. Non sterile gloves for physicians for physical examinations of patients:

- YES
- NO
- NA

14. Non sterile gloves for nurses for any patient care with direct patient contact

- YES
- NO
- NA

15. Any other personal protective materiel?

- YES
- NO
- NA

If YES, please clarify:

- FFP2/3. Please clarify in which situation:.....
- Plastic eye protection. Please clarify in which situation:.....
- Other. Please clarify:.....

16. More frequent disinfection:

|                      | YES | NO | NA |
|----------------------|-----|----|----|
| Consultation room    |     |    |    |
| Day care unit        |     |    |    |
| Hospitalisation unit |     |    |    |

17. Most consultations are by phone or video:

- YES
- NO
- NA

18. Deletion of physical examination in most asymptomatic patients:

Version 1. April 10th, 2020

- YES
- NO
- NA `

If physical examination, is focused on symptoms or of known site of metastasis?

- YES
- NO
- NA `

19. Deletion of routine blood pressure control except if clinically indicated:

- YES
- NO
- NA `

20. Reduction of frequency of blood sampling compared to previous standard patient care by at least 25%:

- YES
- NO
- NA `

21. Reduction of CT scan for tumor response evaluations by at least 25%:

- YES
- NO
- NA `

## Part 5. General organization of the center

22. Does your center have specific COVID Units separated from non-COVID Units

- YES
- NO
- NA `

23. Can you confirm that nurses or medical staff from your department never participate to COVID-positive patients care (night or weekend for example)?

- YES
- NO
- NA `

Version 1. April 10th, 2020

24. Do you have a specific patient pathway for COVID-negative and COVID-positive/suspect oncological cases?

- YES
- NO
- NA `

25. Do you have a specific day care unit for COVID-positive/suspect cases?

- YES
- NO
- NA `

If YES, is a member of your team in charge of this unit?

- YES
- NO
- NA `

26. Do you have a specific overnight oncological section for overnight stay of COVID-positive/suspect cases?

- YES
- NO
- NA

If NO, are these patients mixed in the same unit with COVID-negative patients?

- YES
- NO
- NA

27. Are patients with suspected or confirmed Covid infections transferred to standard COVID-positive sections?

- YES
- NO
- NA

If YES, please clarify if and how you are still involved in care of these patients:

.....

28. At start of Covid crisis has part or full oncology department moved to another location?

- YES

Version 1. April 10th, 2020

- NO  
 NA

If YES, please give short details

.....

29. Do you have specific rooms for work-up while waiting for COVID-test results in your department?

- YES  
 NO  
 NA

If YES, please clarify where:

.....

30. Do you have specific rooms for work-up while waiting for COVID-test result only in the COVID Unit?

- YES  
 NO  
 NA

## Part 6. Multidisciplinary team meetings/activities

31. Do you perform all meetings as visioconference?

- YES  
 NO  
 NA

32. Are multidisciplinary team members other than physicians and nurses still allowed to see patients?

|                         | YES | NO | NA |
|-------------------------|-----|----|----|
| In consultations        |     |    |    |
| In day care unit        |     |    |    |
| In hospitalisation unit |     |    |    |

If YES, who is allowed and where?

.....

33. Do these other team members manage all problems now over phone?

- YES

Version 1. April 10th, 2020

- NO
- NA

## Part 7. Health care staff management and risk reduction

34. In your Institution is required self-isolation at home for at least 1 week if a staff member presents fever?

- YES
- NO
- NA

35. In your Institution is required self-isolation at home if any staff member lives with a family member in self isolation?

- YES
- NO
- NA

36. For healthcare professional tested positive, return to work is allowed after 7 days if no fever since 3 days and no remaining respiratory symptoms?

- YES
- NO
- NA

If NO, negative naso- or oro-pharyngeal swab test is needed?

- YES
- NO
- NA

37. In your Institution there is any other specific role for self-isolation?

- YES
- NO
- NA

If YES, please clarify:

.....

## Part 8. Antibody testing

38. Can you offer antibody testing to health care workers?



Version 1. April 10th, 2020

- YES
- NO
- NA

If YES:

- as research project
- as routine practice
- NA

39. Can you offer antibody testing to patients Yes 9 no 12 NA

- YES
- NO
- NA

If YES:

- as research project
- as routine practice
- NA

## Part 9. Specific measures in the hospitalisation unit

40. Only private rooms are now used?

- YES
- NO
- NA

41. There is a major decrease in palliative care admissions?

- YES
- NO
- NA

42. Do you transfer chemotherapy to day care unit in all patients?

- YES
- NO
- NA

If NO, in more patients than in the past?

- YES
- NO
- NA

Version 1. April 10th, 2020

43. Weekly testing of patients by naso- or oro-pharyngeal swab test (in addition to test at time of admission) is planned?

- YES
- NO
- NA

44. Weekly testing of staff by naso- or oro-pharyngeal swab test is planned?

- YES
- NO
- NA

45. Admission is limited to patients with a negative oropharyngeal swab test?

- YES
- NO
- NA

46. Do you discuss with most patients option not going to the intensive care unit and not being supported in case of severe complications but accepting to die early?

- YES
- NO
- NA
